# Supplementary material for: One-step assembly of CuMo2S3 nanocrystals for the synergistic effect of photothermal therapy and photodynamic therapy
Source: Royal Society of Chemistry journal article supplement (doi:10.1039/c7dt04901c), 2018-01-01
Supplement: c7dt04901c1.pdf [file c7dt04901c1.pdf]

Electronic Supplementary Material (ESI) for Dalton Transactions.  
This journal is © The Royal Society of Chemistry 2017

## Electronic Supplementary Information

### One-step synthesis of $\text{CuMo}_2\text{S}_3$ nanocrystals for synergistic combination of photothermal therapy and photodynamic therapy

Zhi Huang,<sup>‡a</sup> Xijian Liu,<sup>\*‡a</sup> Guoying Deng,<sup>b</sup> Haikuan Yuan,<sup>\*a</sup> Qiugeng Wang,<sup>b</sup> Lijuan Zhang<sup>a</sup> and Jie Lu<sup>\*a</sup>

<sup>a</sup> College of Chemistry and Chemical Engineering, Shanghai University of Engineering Science, Shanghai, 201620, China. E-mail: liuxijian@sues.edu.cn; 107265562@qq.com; dr.lujie@foxmail.com

<sup>b</sup> Trauma Center, Shanghai General Hospital, Shanghai Jiaotong University School of Medicine, NO.650 Xin Songjiang Road, Shanghai, 201620, China.

#### Supplementary Figures and calculation of photothermal conversion efficiency ( $\eta$ )

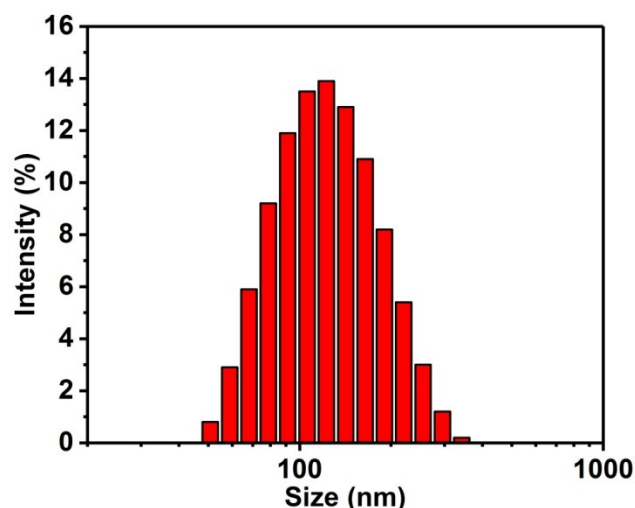

Fig. S1 Size distribution of  $\text{CuMo}_2\text{S}_3$  NCs.

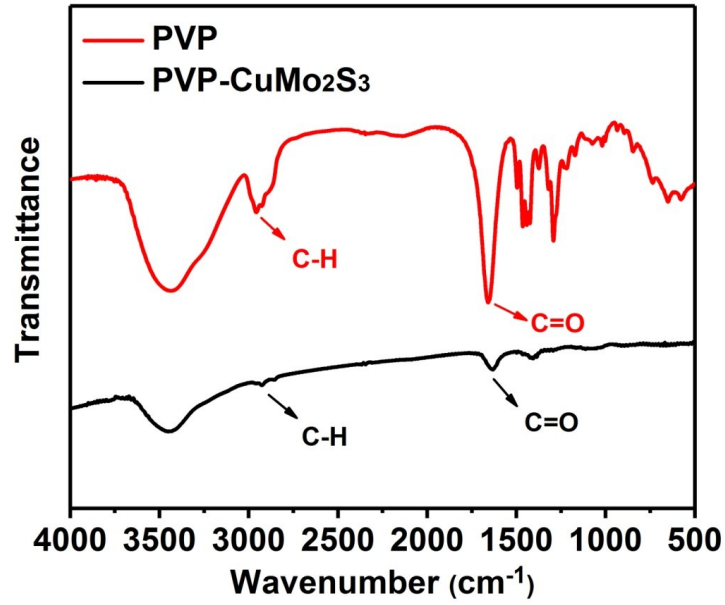

**Fig. S2** Fourier transform infrared spectroscopy (FT-IR) analysis of PVP and PVP-CuMo<sub>2</sub>S<sub>3</sub> NCs.

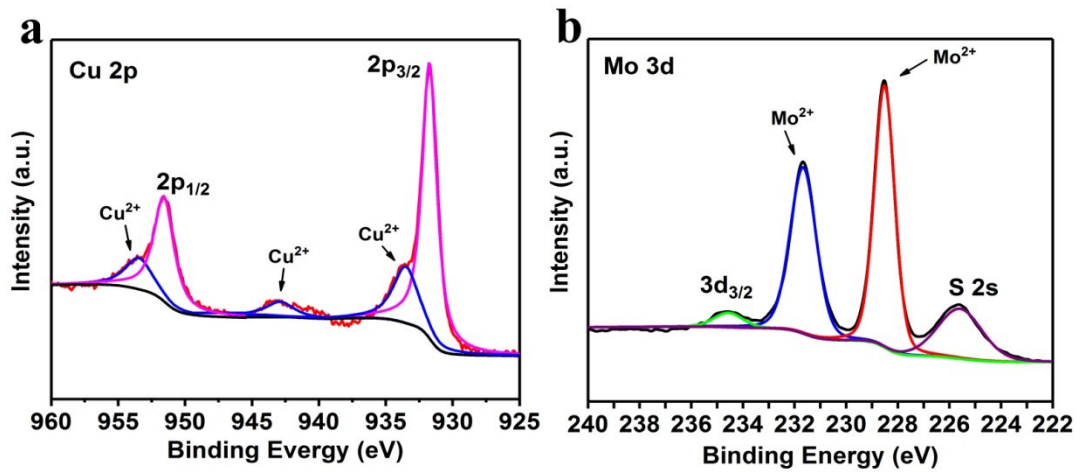

**Fig. S3** XPS of (a) Cu 2p, and (b) Mo 3d.

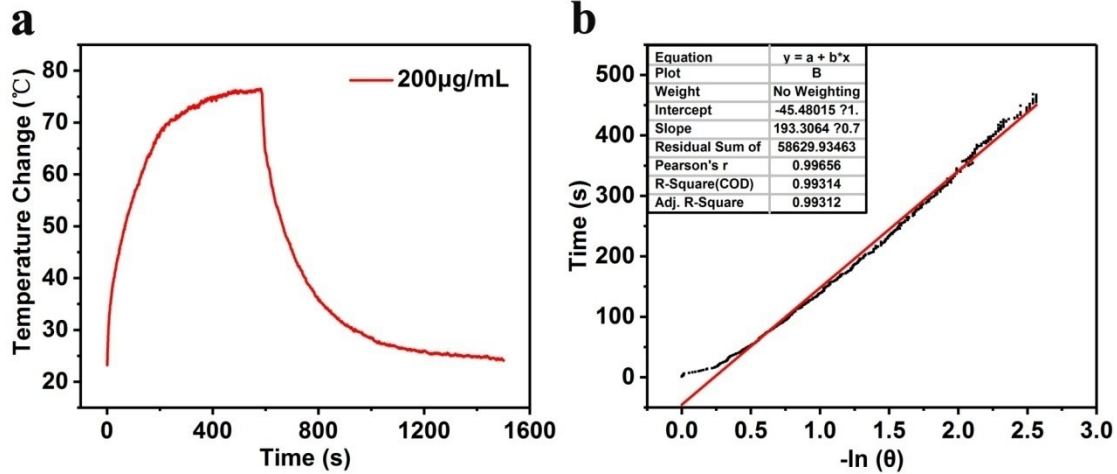

**Fig. S4** (a) Temperature variations of solution containing 200  $\mu\text{g/mL}$   $\text{CuMo}_2\text{S}_3$  NCs. The NIR laser irradiation lasted 600s and then was turned off. (b) Linear relation between the  $t$  and  $-\ln\theta$ .

Here, the photothermal conversion efficiency ( $\eta$ ) of  $\text{CuMo}_2\text{S}_3$  NCs can be calculated by previous literature,<sup>1</sup>  $\text{CuMo}_2\text{S}_3$  NCs aqueous dispersion (200  $\mu\text{g mL}^{-1}$ , 0.2 mL) was irradiated with the NIR laser (808 nm, 1.0  $\text{W cm}^{-2}$ ) until the solution reached a steady-state temperature and then the laser was turned off. The system temperature was cooled down to the ambient temperature.

$$\eta = \frac{hS(T_{max} - T_{surr}) - Q_{Dis}}{I(1 - 10^{-A_\lambda})}$$

where  $h$  is the heat transfer coefficient,  $S$  is the surface area of sample well,  $T_{max}$  and  $T_{surr}$  are the equilibrium temperature and ambient temperature respectively,  $Q_{Dis}$  is the baseline energy input by the solvent and sample cell without nanoparticles,  $I$  is the laser power, and  $A_\lambda$  is the absorbance of the  $\text{CuMo}_2\text{S}_3$  NCs at 808 nm. Based on the obtained data (Figure S4 a and b), the  $\eta$  value of  $\text{CuMo}_2\text{S}_3$  NCs was calculated to be ~45.8%.

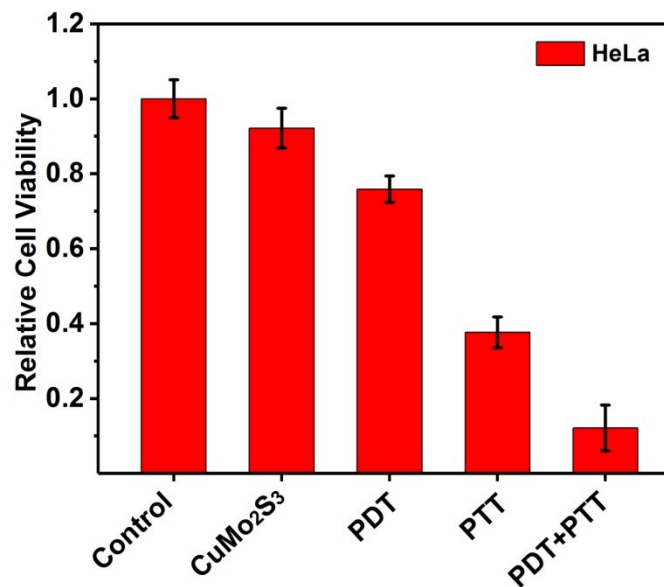

**Fig. S5** Relative viabilities of HeLa cell after different treatments, including the untreated group, only CuMo<sub>2</sub>S<sub>3</sub> group, only PDT group, only PTT group and PDT/PTT combined group.

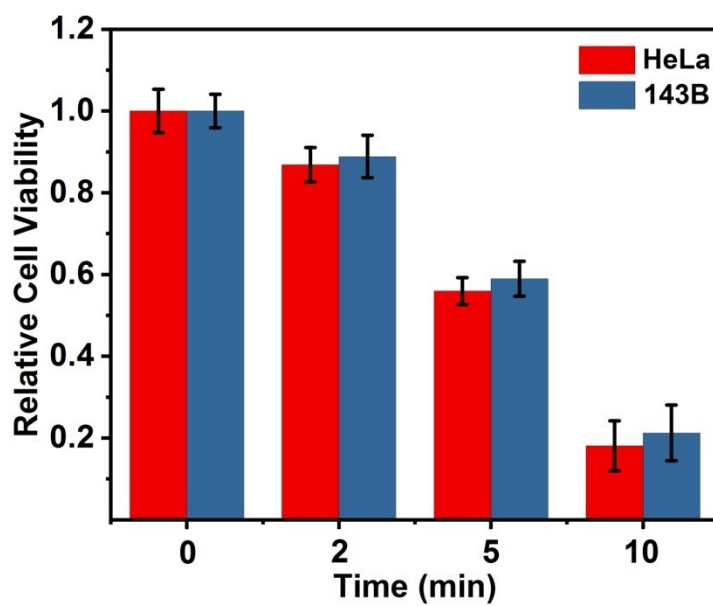

**Fig. S6** Relative viabilities of HeLa and 143B cells incubated with CuMo<sub>2</sub>S<sub>3</sub> NCs under different irradiation duration of 808 nm laser.

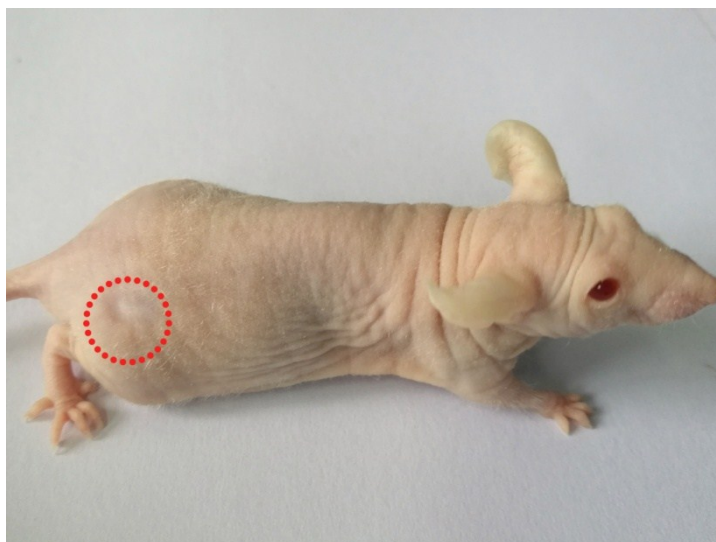

**Fig. S7** Photo of  $\text{CuMo}_2\text{S}_3$  + NIR group mouse at 40th day after treatments, the tumor location was marked with red dotted line circle.

- 1 B. Li, Y. Zhang, R. Zou, Q. Wang, B. Zhang, L. An, F. Yin, Y. Hua and J. Hu, *Dalton Trans.*, 2014, **43**, 6244-6250.
